# Supplementary material
Source: Springer Nature journal article supplement (https://www.springermedizin.de/resource/supplementary/12993_2007_109_MOESM1_ESM.pdf/9617092)
Supplement: MOESM1 [file 9617092]

| Stage I                                                                                                                                                                                                                                                                                         | <p><b>Planning the Review</b></p> <p><b>Research question</b><br/> <b>Identification of the need for a review</b></p>                                                                                                                                                                                                                        | <p><b>Blaya C, Salum GA, Lima MS, Segal SL and Manfro GG</b></p> <p>Is there an association between the 5-HTTLPR and panic disorder?<br/> Several studies with incongruent results and lack of power to detect small effects of this polymorphism determine the need for a supportive theoretical construct.</p>                                                                                                                                                                                                                                                                                                                                                                                                                                                                                                                                                                                                                                                                                                                                                                                                                                                                                                                                                                                                                                                                                                                                                                                                                                                                                                                                                                                                                                                                                                                                                                                                                                                                                                                                                                                                                                                                                                                                                                                                                                                                                                                                                                                                                                                                                                                                                                                                                                                                                                                                                                                                              |                                                    |                  |                                                                                                                                                                                                                                                                                                 |                                                                                                                                                                                                                                                                                           |                           |                  |             |                                                   |                               |  |  |  |              |                     |             |                                                    |           |                     |             |                                                 |                         |                     |             |                                                    |
|-------------------------------------------------------------------------------------------------------------------------------------------------------------------------------------------------------------------------------------------------------------------------------------------------|----------------------------------------------------------------------------------------------------------------------------------------------------------------------------------------------------------------------------------------------------------------------------------------------------------------------------------------------|-------------------------------------------------------------------------------------------------------------------------------------------------------------------------------------------------------------------------------------------------------------------------------------------------------------------------------------------------------------------------------------------------------------------------------------------------------------------------------------------------------------------------------------------------------------------------------------------------------------------------------------------------------------------------------------------------------------------------------------------------------------------------------------------------------------------------------------------------------------------------------------------------------------------------------------------------------------------------------------------------------------------------------------------------------------------------------------------------------------------------------------------------------------------------------------------------------------------------------------------------------------------------------------------------------------------------------------------------------------------------------------------------------------------------------------------------------------------------------------------------------------------------------------------------------------------------------------------------------------------------------------------------------------------------------------------------------------------------------------------------------------------------------------------------------------------------------------------------------------------------------------------------------------------------------------------------------------------------------------------------------------------------------------------------------------------------------------------------------------------------------------------------------------------------------------------------------------------------------------------------------------------------------------------------------------------------------------------------------------------------------------------------------------------------------------------------------------------------------------------------------------------------------------------------------------------------------------------------------------------------------------------------------------------------------------------------------------------------------------------------------------------------------------------------------------------------------------------------------------------------------------------------------------------------------|----------------------------------------------------|------------------|-------------------------------------------------------------------------------------------------------------------------------------------------------------------------------------------------------------------------------------------------------------------------------------------------|-------------------------------------------------------------------------------------------------------------------------------------------------------------------------------------------------------------------------------------------------------------------------------------------|---------------------------|------------------|-------------|---------------------------------------------------|-------------------------------|--|--|--|--------------|---------------------|-------------|----------------------------------------------------|-----------|---------------------|-------------|-------------------------------------------------|-------------------------|---------------------|-------------|----------------------------------------------------|
| Stage II                                                                                                                                                                                                                                                                                        | <p><b>Conducting a Review</b></p> <p><b>Identification of research</b></p> <p><b>Study quality assessments and study inclusion / exclusion criteria</b></p> <p><b>Selection of studies</b></p> <p><b>Data synthesis and data analysis</b></p>                                                                                                | <p>Studies were identified through PubMed, PsychInfo, Lilacs and ISI. The PubMed search was run using the Mesh terms: ("Serotonin Plasma Membrane Transport Proteins"[MeSH] OR "5-HTTLPR" OR "5-HTT" OR "SLC6A4") AND "Panic Disorder"[MeSH]. In PsychINFO, Lilacs and ISI the following words were used: "Panic" AND ("serotonin transporter" OR "serotonergic transporter" OR "5-HTT" OR "5-HTTLPR" OR "SLC6A4"). Check reference section of publications found through our search was used to identify additional studies that may have been missed. Contact was tried with all authors in order to identify unpublished data</p> <p>Quality assessment criteria</p> <ul style="list-style-type: none"> <li>▪ Panic Disorder diagnosis (DSM or ICD);</li> <li>▪ Case-control or family-based studies;</li> <li>▪ Hardy-Weinberg Equilibrium (HWE).</li> </ul> <p>Exclusion criteria</p> <ul style="list-style-type: none"> <li>▪ All patients with major psychiatric disorders other than PD;</li> <li>▪ Replicated data;</li> <li>▪ Insufficient data to perform statistical analysis.</li> </ul> <p>Studies were selected by two authors (CB and GAS) independently. Discrepancies were resolved by mutual consent and a third opinion (GGM). Exclusion reasons can be seen below the flowchart.</p> <table border="1" style="width: 100%; border-collapse: collapse;"> <thead> <tr> <th style="text-align: left;">Included Studies</th> <th style="text-align: left;">Excluded Studies</th> </tr> </thead> <tbody> <tr> <td>Deckert et al. (German) [34];<br/>Deckert et al. (Italian) [34];<br/>Ishiguro et al. [35];<br/>Maron et al. [12];<br/>Martinez-Barondo et al. [40]<br/>Matsushita et al. [36];<br/>Ohara et al. [37];<br/>Olesen et al. [39];<br/>Samochowiec et al. [38];<br/>Hamilton et al. [21];<br/>Kim et al. [41].</td> <td>Hajduk [31]<sup>‡</sup>;<br/>Maron et al. [28]<sup>*</sup>;<br/>Maron et al. [29]<sup>‡</sup>;<br/>Perez et al. [32]<sup>‡</sup>;<br/>Perna et al. [26]<sup>*</sup>;<br/>Rotondo et al. [25]<sup>‡</sup>;<br/>Rotondo et al. [33]<sup>‡</sup>;<br/>Sand et al. [30]<sup>‡</sup>.</td> </tr> </tbody> </table> <p>Only case-control studies were included in the analyses. The fixed-effect OR was used to summarize the results of each single study and the pooled OR. The Q test and I<sup>2</sup> statistic were used to assess heterogeneity between studies. We carried out allelic and genotypic (s dominant) tests stratifying each one for ethnicity, control group quality and agoraphobia comorbidity, in a total of fourteen analyses sets.</p>                                                                                                                                                                                                                                                                                                               | Included Studies                                   | Excluded Studies | Deckert et al. (German) [34];<br>Deckert et al. (Italian) [34];<br>Ishiguro et al. [35];<br>Maron et al. [12];<br>Martinez-Barondo et al. [40]<br>Matsushita et al. [36];<br>Ohara et al. [37];<br>Olesen et al. [39];<br>Samochowiec et al. [38];<br>Hamilton et al. [21];<br>Kim et al. [41]. | Hajduk [31] <sup>‡</sup> ;<br>Maron et al. [28] <sup>*</sup> ;<br>Maron et al. [29] <sup>‡</sup> ;<br>Perez et al. [32] <sup>‡</sup> ;<br>Perna et al. [26] <sup>*</sup> ;<br>Rotondo et al. [25] <sup>‡</sup> ;<br>Rotondo et al. [33] <sup>‡</sup> ;<br>Sand et al. [30] <sup>‡</sup> . |                           |                  |             |                                                   |                               |  |  |  |              |                     |             |                                                    |           |                     |             |                                                 |                         |                     |             |                                                    |
| Included Studies                                                                                                                                                                                                                                                                                | Excluded Studies                                                                                                                                                                                                                                                                                                                             |                                                                                                                                                                                                                                                                                                                                                                                                                                                                                                                                                                                                                                                                                                                                                                                                                                                                                                                                                                                                                                                                                                                                                                                                                                                                                                                                                                                                                                                                                                                                                                                                                                                                                                                                                                                                                                                                                                                                                                                                                                                                                                                                                                                                                                                                                                                                                                                                                                                                                                                                                                                                                                                                                                                                                                                                                                                                                                                               |                                                    |                  |                                                                                                                                                                                                                                                                                                 |                                                                                                                                                                                                                                                                                           |                           |                  |             |                                                   |                               |  |  |  |              |                     |             |                                                    |           |                     |             |                                                 |                         |                     |             |                                                    |
| Deckert et al. (German) [34];<br>Deckert et al. (Italian) [34];<br>Ishiguro et al. [35];<br>Maron et al. [12];<br>Martinez-Barondo et al. [40]<br>Matsushita et al. [36];<br>Ohara et al. [37];<br>Olesen et al. [39];<br>Samochowiec et al. [38];<br>Hamilton et al. [21];<br>Kim et al. [41]. | Hajduk [31] <sup>‡</sup> ;<br>Maron et al. [28] <sup>*</sup> ;<br>Maron et al. [29] <sup>‡</sup> ;<br>Perez et al. [32] <sup>‡</sup> ;<br>Perna et al. [26] <sup>*</sup> ;<br>Rotondo et al. [25] <sup>‡</sup> ;<br>Rotondo et al. [33] <sup>‡</sup> ;<br>Sand et al. [30] <sup>‡</sup> .                                                    |                                                                                                                                                                                                                                                                                                                                                                                                                                                                                                                                                                                                                                                                                                                                                                                                                                                                                                                                                                                                                                                                                                                                                                                                                                                                                                                                                                                                                                                                                                                                                                                                                                                                                                                                                                                                                                                                                                                                                                                                                                                                                                                                                                                                                                                                                                                                                                                                                                                                                                                                                                                                                                                                                                                                                                                                                                                                                                                               |                                                    |                  |                                                                                                                                                                                                                                                                                                 |                                                                                                                                                                                                                                                                                           |                           |                  |             |                                                   |                               |  |  |  |              |                     |             |                                                    |           |                     |             |                                                 |                         |                     |             |                                                    |
| Stage III                                                                                                                                                                                                                                                                                       | <p><b>Reporting and Dissemination</b></p> <p><b>The report</b></p> <p><b>Analyses</b></p> <p>Allele analysis (s vs. l)<br/> Stratified analysis (s vs. l)<br/>     High Quality<br/>     Caucasian<br/>     Agoraphobia comorbidity</p> <p><b>Recommendations for further investigation</b></p> <p><b>Getting evidence into practice</b></p> | <table border="1" style="width: 100%; border-collapse: collapse;"> <thead> <tr> <th></th> <th style="text-align: center;">OR (CI95%)</th> <th style="text-align: center;">p-value (z)</th> <th style="text-align: center;">Heterogeneity Q test (p-value; I<sup>2</sup>)</th> </tr> </thead> <tbody> <tr> <td>Allele analysis (s vs. l)</td> <td style="text-align: center;">0.91 (0.80-1.03)</td> <td style="text-align: center;">0.14 (1.47)</td> <td style="text-align: center;">X<sup>2</sup><sub>df=9</sub>=9.75 (0.37; 7.7%)</td> </tr> <tr> <td>Stratified analysis (s vs. l)</td> <td></td> <td></td> <td></td> </tr> <tr> <td>    High Quality</td> <td style="text-align: center;">0.88 (0.75 to 1.04)</td> <td style="text-align: center;">0.13 (1.52)</td> <td style="text-align: center;">X<sup>2</sup><sub>df=4</sub>=6.51 (0.16; 38.6%)</td> </tr> <tr> <td>    Caucasian</td> <td style="text-align: center;">0.86 (0.74 to 1.01)</td> <td style="text-align: center;">0.06 (1.88)</td> <td style="text-align: center;">X<sup>2</sup><sub>df=5</sub>=4.72 (0.45; 0%)</td> </tr> <tr> <td>    Agoraphobia comorbidity</td> <td style="text-align: center;">0.94 (0.77 to 1.15)</td> <td style="text-align: center;">0.57 (0.57)</td> <td style="text-align: center;">X<sup>2</sup><sub>df=3</sub>=5.21 (0.16; 42.1%)</td> </tr> </tbody> </table> <ol style="list-style-type: none"> <li>1. Adopt a lifelong perspective of PD;</li> <li>2. Appropriate analysis of HWE;</li> <li>3. Larger samples to detect the expected small effect of this polymorphism;</li> <li>4. An adequate control group with: (a) standardized psychiatric diagnoses (DSM or CIDI, for example) assessing the lifelong absence of psychiatric disorders, (b) controls should be old enough in order to reduce the possibility for the late onset of the disorder;</li> <li>5. An exploratory analysis of the clinical manifestation, considering the nuances of Panic Disorder (i.e., agoraphobia, phobic avoidance, panic attacks, etc.) and other ways to investigate the heritable portion of PD;</li> <li>6. Special attention to comorbidities, considering the significant influence of this polymorphism in other psychiatric conditions;</li> <li>7. The role evaluation of this polymorphism in other situations such as therapeutic responses;</li> <li>8. Genotypes must be determined blinding to case-control status in order to minimize the risk of a result influenced by an investigator's preconceptions [13];</li> <li>9. Corrections for multiple comparisons (e.g., Bonferroni correction), in case of multiple diagnostic schemes, models of inheritance or multiple genes tests;</li> <li>10. Caution on interpretation of results, considering the non-causal pathways, the alpha error and the prior probabilities.</li> </ol> <p>The role of 5-HTTLPR in PD still needs more adequate investigation.</p> |                                                    | OR (CI95%)       | p-value (z)                                                                                                                                                                                                                                                                                     | Heterogeneity Q test (p-value; I <sup>2</sup> )                                                                                                                                                                                                                                           | Allele analysis (s vs. l) | 0.91 (0.80-1.03) | 0.14 (1.47) | X <sup>2</sup> <sub>df=9</sub> =9.75 (0.37; 7.7%) | Stratified analysis (s vs. l) |  |  |  | High Quality | 0.88 (0.75 to 1.04) | 0.13 (1.52) | X <sup>2</sup> <sub>df=4</sub> =6.51 (0.16; 38.6%) | Caucasian | 0.86 (0.74 to 1.01) | 0.06 (1.88) | X <sup>2</sup> <sub>df=5</sub> =4.72 (0.45; 0%) | Agoraphobia comorbidity | 0.94 (0.77 to 1.15) | 0.57 (0.57) | X <sup>2</sup> <sub>df=3</sub> =5.21 (0.16; 42.1%) |
|                                                                                                                                                                                                                                                                                                 | OR (CI95%)                                                                                                                                                                                                                                                                                                                                   | p-value (z)                                                                                                                                                                                                                                                                                                                                                                                                                                                                                                                                                                                                                                                                                                                                                                                                                                                                                                                                                                                                                                                                                                                                                                                                                                                                                                                                                                                                                                                                                                                                                                                                                                                                                                                                                                                                                                                                                                                                                                                                                                                                                                                                                                                                                                                                                                                                                                                                                                                                                                                                                                                                                                                                                                                                                                                                                                                                                                                   | Heterogeneity Q test (p-value; I <sup>2</sup> )    |                  |                                                                                                                                                                                                                                                                                                 |                                                                                                                                                                                                                                                                                           |                           |                  |             |                                                   |                               |  |  |  |              |                     |             |                                                    |           |                     |             |                                                 |                         |                     |             |                                                    |
| Allele analysis (s vs. l)                                                                                                                                                                                                                                                                       | 0.91 (0.80-1.03)                                                                                                                                                                                                                                                                                                                             | 0.14 (1.47)                                                                                                                                                                                                                                                                                                                                                                                                                                                                                                                                                                                                                                                                                                                                                                                                                                                                                                                                                                                                                                                                                                                                                                                                                                                                                                                                                                                                                                                                                                                                                                                                                                                                                                                                                                                                                                                                                                                                                                                                                                                                                                                                                                                                                                                                                                                                                                                                                                                                                                                                                                                                                                                                                                                                                                                                                                                                                                                   | X <sup>2</sup> <sub>df=9</sub> =9.75 (0.37; 7.7%)  |                  |                                                                                                                                                                                                                                                                                                 |                                                                                                                                                                                                                                                                                           |                           |                  |             |                                                   |                               |  |  |  |              |                     |             |                                                    |           |                     |             |                                                 |                         |                     |             |                                                    |
| Stratified analysis (s vs. l)                                                                                                                                                                                                                                                                   |                                                                                                                                                                                                                                                                                                                                              |                                                                                                                                                                                                                                                                                                                                                                                                                                                                                                                                                                                                                                                                                                                                                                                                                                                                                                                                                                                                                                                                                                                                                                                                                                                                                                                                                                                                                                                                                                                                                                                                                                                                                                                                                                                                                                                                                                                                                                                                                                                                                                                                                                                                                                                                                                                                                                                                                                                                                                                                                                                                                                                                                                                                                                                                                                                                                                                               |                                                    |                  |                                                                                                                                                                                                                                                                                                 |                                                                                                                                                                                                                                                                                           |                           |                  |             |                                                   |                               |  |  |  |              |                     |             |                                                    |           |                     |             |                                                 |                         |                     |             |                                                    |
| High Quality                                                                                                                                                                                                                                                                                    | 0.88 (0.75 to 1.04)                                                                                                                                                                                                                                                                                                                          | 0.13 (1.52)                                                                                                                                                                                                                                                                                                                                                                                                                                                                                                                                                                                                                                                                                                                                                                                                                                                                                                                                                                                                                                                                                                                                                                                                                                                                                                                                                                                                                                                                                                                                                                                                                                                                                                                                                                                                                                                                                                                                                                                                                                                                                                                                                                                                                                                                                                                                                                                                                                                                                                                                                                                                                                                                                                                                                                                                                                                                                                                   | X <sup>2</sup> <sub>df=4</sub> =6.51 (0.16; 38.6%) |                  |                                                                                                                                                                                                                                                                                                 |                                                                                                                                                                                                                                                                                           |                           |                  |             |                                                   |                               |  |  |  |              |                     |             |                                                    |           |                     |             |                                                 |                         |                     |             |                                                    |
| Caucasian                                                                                                                                                                                                                                                                                       | 0.86 (0.74 to 1.01)                                                                                                                                                                                                                                                                                                                          | 0.06 (1.88)                                                                                                                                                                                                                                                                                                                                                                                                                                                                                                                                                                                                                                                                                                                                                                                                                                                                                                                                                                                                                                                                                                                                                                                                                                                                                                                                                                                                                                                                                                                                                                                                                                                                                                                                                                                                                                                                                                                                                                                                                                                                                                                                                                                                                                                                                                                                                                                                                                                                                                                                                                                                                                                                                                                                                                                                                                                                                                                   | X <sup>2</sup> <sub>df=5</sub> =4.72 (0.45; 0%)    |                  |                                                                                                                                                                                                                                                                                                 |                                                                                                                                                                                                                                                                                           |                           |                  |             |                                                   |                               |  |  |  |              |                     |             |                                                    |           |                     |             |                                                 |                         |                     |             |                                                    |
| Agoraphobia comorbidity                                                                                                                                                                                                                                                                         | 0.94 (0.77 to 1.15)                                                                                                                                                                                                                                                                                                                          | 0.57 (0.57)                                                                                                                                                                                                                                                                                                                                                                                                                                                                                                                                                                                                                                                                                                                                                                                                                                                                                                                                                                                                                                                                                                                                                                                                                                                                                                                                                                                                                                                                                                                                                                                                                                                                                                                                                                                                                                                                                                                                                                                                                                                                                                                                                                                                                                                                                                                                                                                                                                                                                                                                                                                                                                                                                                                                                                                                                                                                                                                   | X <sup>2</sup> <sub>df=3</sub> =5.21 (0.16; 42.1%) |                  |                                                                                                                                                                                                                                                                                                 |                                                                                                                                                                                                                                                                                           |                           |                  |             |                                                   |                               |  |  |  |              |                     |             |                                                    |           |                     |             |                                                 |                         |                     |             |                                                    |

Based on CDR Report, NHS Centre for Reviews and Dissemination, University of York and Cochrane Handbook

**Exclusion reasons:** \*Without control group; <sup>‡</sup>Replicated data; <sup>‡</sup> All patients with major Psychiatric comorbidity other than PD; <sup>‡</sup> Hardy-Weinberg departure; <sup>‡</sup> Insufficient data;
